# Supplementary material
Source: HighWire-hosted journal article supplement (https://jnm.snmjournals.org/highwire/filestream/94940/field_highwire_adjunct_files/0/171983_Supplemental_Data.pdf)
Supplement: 171983_Supplemental_Data.pdf [file 171983_Supplemental_Data.pdf]

Supplemental Fig. 1

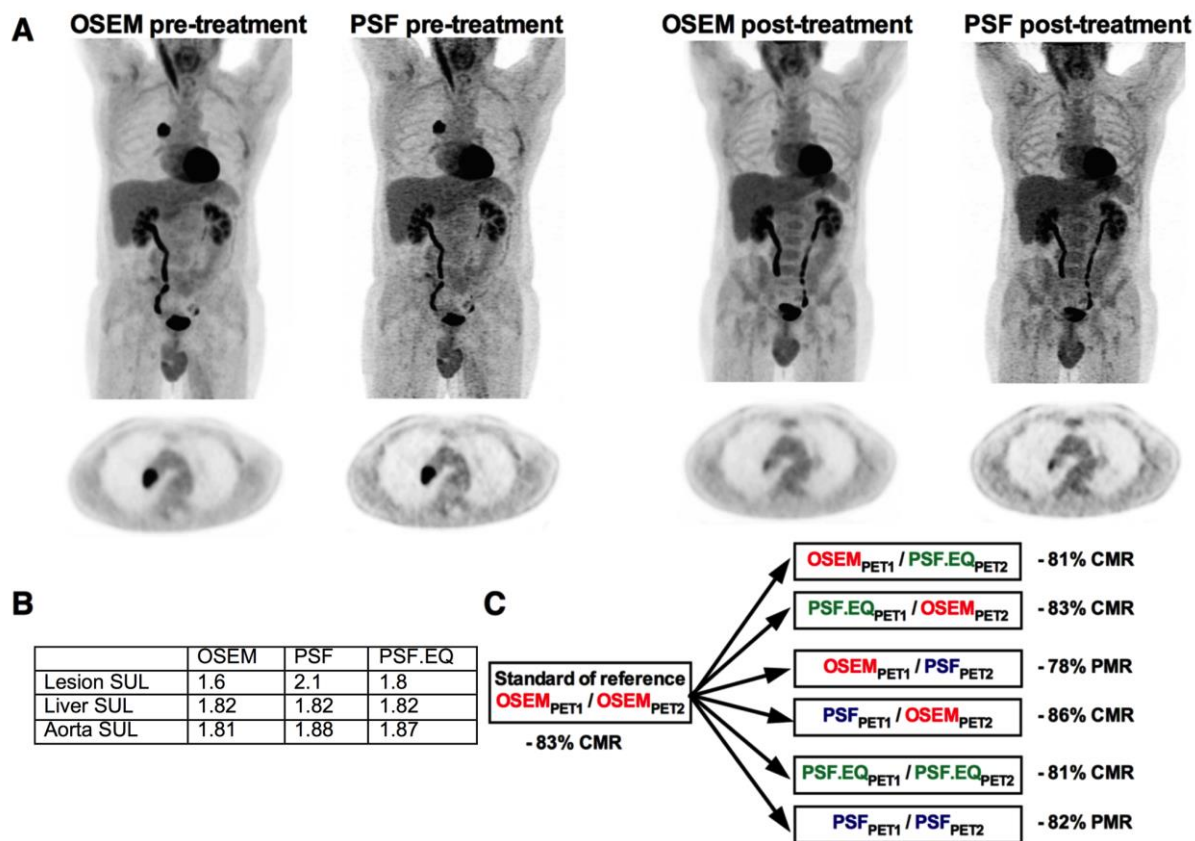

56-year-old male with non-small cell lung cancer treated by chemotherapy, classified as CMR according to the OSEM<sub>PET1</sub>/OSEM<sub>PET2</sub> standard of reference, while reconstruction inconsistency (OSEM<sub>PET1</sub>/PSF<sub>PET2</sub>, a scenario mimicking a system upgrade during a trial) led to a PMR classification. The use of the EQ.PET technology correctly classified the patient as CMR. A: MIP and transverse slices at the level of the liver metastasis for the OSEM and PSF reconstructions and for baseline and post-treatment scans ; B : Residual SUL in the lesion scan and background level in the liver and in the blood pool on post-treatment scan ; C : % change in SUL<sub>peak</sub> and PERCIST classification according to the different scenarios. Note the discrepancy between scenarios involving reconstruction consistency but use of different reconstruction algorithms.

**Supplemental Table 1.**

**All lesions**

| OSEM <sub>PET1</sub> /OSEM <sub>PET2</sub> versus OSEM <sub>PET1</sub> /PSF±TOF.EQ <sub>PET2</sub> |     |     |     |     |
|----------------------------------------------------------------------------------------------------|-----|-----|-----|-----|
|                                                                                                    | CMR | PMR | SMD | PMD |
| CMR                                                                                                | 9   | 1   | 0   | 0   |
| PMR                                                                                                | 0   | 21  | 0   | 0   |
| SMD                                                                                                | 0   | 1   | 24  | 1   |
| PMD                                                                                                | 0   | 0   | 0   | 29  |

| OSEM <sub>PET1</sub> /OSEM <sub>PET2</sub> versus PSF±TOF.EQ <sub>PET1</sub> /OSEM <sub>PET2</sub> |     |     |     |     |
|----------------------------------------------------------------------------------------------------|-----|-----|-----|-----|
|                                                                                                    | CMR | PMR | SMD | PMD |
| CMR                                                                                                | 10  | 0   | 0   | 0   |
| PMR                                                                                                | 0   | 21  | 0   | 0   |
| SMD                                                                                                | 0   | 0   | 26  | 0   |
| PMD                                                                                                | 0   | 0   | 0   | 29  |

| OSEM <sub>PET1</sub> /OSEM <sub>PET2</sub> versus OSEM <sub>PET1</sub> /PSF±TOF <sub>PET2</sub> |     |     |     |     |
|-------------------------------------------------------------------------------------------------|-----|-----|-----|-----|
|                                                                                                 | CMR | PMR | SMD | PMD |
| CMR                                                                                             | 7   | 3   | 0   | 0   |
| PMR                                                                                             | 0   | 14  | 7   | 0   |
| SMD                                                                                             | 0   | 0   | 19  | 7   |
| PMD                                                                                             | 0   | 0   | 0   | 29  |

| OSEM <sub>PET1</sub> /OSEM <sub>PET2</sub> versus PSF±TOF <sub>PET1</sub> /OSEM <sub>PET2</sub> |     |     |     |     |
|-------------------------------------------------------------------------------------------------|-----|-----|-----|-----|
|                                                                                                 | CMR | PMR | SMD | PMD |
| CMR                                                                                             | 10  | 0   | 0   | 0   |
| PMR                                                                                             | 0   | 21  | 0   | 0   |
| SMD                                                                                             | 0   | 11  | 15  | 0   |
| PMD                                                                                             | 0   | 0   | 2   | 27  |

| OSEM <sub>PET1</sub> /OSEM <sub>PET2</sub> versus PSF±TOF.EQ <sub>PET1</sub> /PSF±TOF.EQ <sub>PET2</sub> |     |     |     |     |
|----------------------------------------------------------------------------------------------------------|-----|-----|-----|-----|
|                                                                                                          | CMR | PMR | SMD | PMD |
| CMR                                                                                                      | 9   | 1   | 0   | 0   |
| PMR                                                                                                      | 0   | 21  | 0   | 0   |
| SMD                                                                                                      | 0   | 1   | 23  | 2   |
| PMD                                                                                                      | 0   | 0   | 0   | 29  |

| OSEM <sub>PET1</sub> /OSEM <sub>PET2</sub> versus PSF±TOF <sub>PET1</sub> /PSF±TOF <sub>PET2</sub> |     |     |     |     |
|----------------------------------------------------------------------------------------------------|-----|-----|-----|-----|
|                                                                                                    | CMR | PMR | SMD | PMD |
| CMR                                                                                                | 7   | 3   | 0   | 0   |
| PMR                                                                                                | 0   | 21  | 0   | 0   |
| SMD                                                                                                | 0   | 0   | 25  | 1   |
| PMD                                                                                                | 0   | 0   | 1   | 28  |

## NSCLCC

| OSEM <sub>PET1</sub> /OSEM <sub>PET2</sub> versus OSEM <sub>PET1</sub> /PSF±TOF.EQ <sub>PET2</sub> |     |     |     |     |
|----------------------------------------------------------------------------------------------------|-----|-----|-----|-----|
|                                                                                                    | CMR | PMR | SMD | PMD |
| CMR                                                                                                | 6   | 1   | 0   | 0   |
| PMR                                                                                                | 0   | 10  | 0   | 0   |
| SMD                                                                                                | 0   | 1   | 13  | 0   |
| PMD                                                                                                | 0   | 0   | 0   | 20  |

| OSEM <sub>PET1</sub> /OSEM <sub>PET2</sub> versus PSF±TOF.EQ <sub>PET1</sub> /OSEM <sub>PET2</sub> |     |     |     |     |
|----------------------------------------------------------------------------------------------------|-----|-----|-----|-----|
|                                                                                                    | CMR | PMR | SMD | PMD |
| CMR                                                                                                | 7   | 0   | 0   | 0   |
| PMR                                                                                                | 0   | 10  | 0   | 0   |
| SMD                                                                                                | 0   | 0   | 14  | 0   |
| PMD                                                                                                | 0   | 0   | 0   | 20  |

| OSEM <sub>PET1</sub> /OSEM <sub>PET2</sub> versus OSEM <sub>PET1</sub> /PSF±TOF <sub>PET2</sub> |     |     |     |     |
|-------------------------------------------------------------------------------------------------|-----|-----|-----|-----|
|                                                                                                 | CMR | PMR | SMD | PMD |
| CMR                                                                                             | 5   | 2   | 0   | 0   |
| PMR                                                                                             | 0   | 5   | 5   | 0   |
| SMD                                                                                             | 0   | 0   | 12  | 2   |
| PMD                                                                                             | 0   | 0   | 0   | 20  |

| OSEM <sub>PET1</sub> /OSEM <sub>PET2</sub> versus PSF±TOF <sub>PET1</sub> /OSEM <sub>PET2</sub> |     |     |     |     |
|-------------------------------------------------------------------------------------------------|-----|-----|-----|-----|
|                                                                                                 | CMR | PMR | SMD | PMD |
| CMR                                                                                             | 7   | 0   | 0   | 0   |
| PMR                                                                                             | 0   | 10  | 0   | 0   |
| SMD                                                                                             | 0   | 0   | 7   | 7   |
| PMD                                                                                             | 0   | 0   | 2   | 18  |

| OSEM <sub>PET1</sub> /OSEM <sub>PET2</sub> versus PSF±TOF.EQ <sub>PET1</sub> /PSF±TOF.EQ <sub>PET2</sub> |     |     |     |     |
|----------------------------------------------------------------------------------------------------------|-----|-----|-----|-----|
|                                                                                                          | CMR | PMR | SMD | PMD |
| CMR                                                                                                      | 6   | 1   | 0   | 0   |
| PMR                                                                                                      | 0   | 10  | 0   | 0   |
| SMD                                                                                                      | 0   | 1   | 12  | 1   |
| PMD                                                                                                      | 0   | 0   | 0   | 20  |

| OSEM <sub>PET1</sub> /OSEM <sub>PET2</sub> versus PSF±TOF <sub>PET1</sub> /PSF±TOF <sub>PET2</sub> |     |     |     |     |
|----------------------------------------------------------------------------------------------------|-----|-----|-----|-----|
|                                                                                                    | CMR | PMR | SMD | PMD |
| CMR                                                                                                | 5   | 2   | 0   | 0   |
| PMR                                                                                                | 0   | 10  | 0   | 0   |
| SMD                                                                                                | 0   | 0   | 14  | 0   |
| PMD                                                                                                | 0   | 0   | 1   | 19  |

### Colorectal liver metastases

| OSEM <sub>PET1</sub> /OSEM <sub>PET2</sub> versus OSEM <sub>PET1</sub> /PSF±TOF.EQ <sub>PET2</sub> |     |     |     |     |
|----------------------------------------------------------------------------------------------------|-----|-----|-----|-----|
|                                                                                                    | CMR | PMR | SMD | PMD |
| CMR                                                                                                | 3   | 0   | 0   | 0   |
| PMR                                                                                                | 0   | 9   | 0   | 0   |
| SMD                                                                                                | 0   | 0   | 7   | 0   |
| PMD                                                                                                | 0   | 0   | 0   | 5   |

| OSEM <sub>PET1</sub> /OSEM <sub>PET2</sub> versus PSF±TOF.EQ <sub>PET1</sub> /OSEM <sub>PET2</sub> |     |     |     |     |
|----------------------------------------------------------------------------------------------------|-----|-----|-----|-----|
|                                                                                                    | CMR | PMR | SMD | PMD |
| CMR                                                                                                | 3   | 0   | 0   | 0   |
| PMR                                                                                                | 0   | 9   | 0   | 0   |
| SMD                                                                                                | 0   | 0   | 7   | 0   |
| PMD                                                                                                | 0   | 0   | 0   | 5   |

| OSEM <sub>PET1</sub> /OSEM <sub>PET2</sub> versus OSEM <sub>PET1</sub> /PSF±TOF <sub>PET2</sub> |     |     |     |     |
|-------------------------------------------------------------------------------------------------|-----|-----|-----|-----|
|                                                                                                 | CMR | PMR | SMD | PMD |
| CMR                                                                                             | 2   | 1   | 0   | 0   |
| PMR                                                                                             | 0   | 7   | 2   | 0   |
| SMD                                                                                             | 0   | 0   | 5   | 2   |
| PMD                                                                                             | 0   | 0   | 0   | 5   |

| OSEM <sub>PET1</sub> /OSEM <sub>PET2</sub> versus PSF±TOF <sub>PET1</sub> /OSEM <sub>PET2</sub> |     |     |     |     |
|-------------------------------------------------------------------------------------------------|-----|-----|-----|-----|
|                                                                                                 | CMR | PMR | SMD | PMD |
| CMR                                                                                             | 3   | 0   | 0   | 0   |
| PMR                                                                                             | 0   | 9   | 0   | 0   |
| SMD                                                                                             | 0   | 4   | 3   | 0   |
| PMD                                                                                             | 0   | 0   | 0   | 5   |

| OSEM <sub>PET1</sub> /OSEM <sub>PET2</sub> versus PSF±TOF.EQ <sub>PET1</sub> /PSF±TOF.EQ <sub>PET2</sub> |     |     |     |     |
|----------------------------------------------------------------------------------------------------------|-----|-----|-----|-----|
|                                                                                                          | CMR | PMR | SMD | PMD |
| CMR                                                                                                      | 3   | 0   | 0   | 0   |
| PMR                                                                                                      | 0   | 9   | 0   | 0   |
| SMD                                                                                                      | 0   | 0   | 7   | 0   |
| PMD                                                                                                      | 0   | 0   | 0   | 5   |

| OSEM <sub>PET1</sub> /OSEM <sub>PET2</sub> versus PSF±TOF <sub>PET1</sub> /PSF±TOF <sub>PET2</sub> |     |     |     |     |
|----------------------------------------------------------------------------------------------------|-----|-----|-----|-----|
|                                                                                                    | CMR | PMR | SMD | PMD |
| CMR                                                                                                | 2   | 1   | 0   | 0   |
| PMR                                                                                                | 0   | 9   | 0   | 0   |
| SMD                                                                                                | 0   | 0   | 7   | 0   |
| PMD                                                                                                | 0   | 0   | 0   | 5   |

## Melanoma

| OSEM <sub>PET1</sub> /OSEM <sub>PET2</sub> versus OSEM <sub>PET1</sub> /PSF±TOF.EQ <sub>PET2</sub> |     |     |     |     |
|----------------------------------------------------------------------------------------------------|-----|-----|-----|-----|
|                                                                                                    | CMR | PMR | SMD | PMD |
| CMR                                                                                                | 0   | 0   | 0   | 0   |
| PMR                                                                                                | 0   | 2   | 0   | 0   |
| SMD                                                                                                | 0   | 0   | 4   | 1   |
| PMD                                                                                                | 0   | 0   | 0   | 4   |

| OSEM <sub>PET1</sub> /OSEM <sub>PET2</sub> versus PSF±TOF.EQ <sub>PET1</sub> /OSEM <sub>PET2</sub> |     |     |     |     |
|----------------------------------------------------------------------------------------------------|-----|-----|-----|-----|
|                                                                                                    | CMR | PMR | SMD | PMD |
| CMR                                                                                                | 0   | 0   | 0   | 0   |
| PMR                                                                                                | 0   | 2   | 0   | 0   |
| SMD                                                                                                | 0   | 0   | 5   | 0   |
| PMD                                                                                                | 0   | 0   | 0   | 4   |

| OSEM <sub>PET1</sub> /OSEM <sub>PET2</sub> versus OSEM <sub>PET1</sub> /PSF±TOF <sub>PET2</sub> |     |     |     |     |
|-------------------------------------------------------------------------------------------------|-----|-----|-----|-----|
|                                                                                                 | CMR | PMR | SMD | PMD |
| CMR                                                                                             | 0   | 0   | 0   | 0   |
| PMR                                                                                             | 0   | 2   | 0   | 0   |
| SMD                                                                                             | 0   | 0   | 2   | 3   |
| PMD                                                                                             | 0   | 0   | 0   | 4   |

| OSEM <sub>PET1</sub> /OSEM <sub>PET2</sub> versus PSF±TOF <sub>PET1</sub> /OSEM <sub>PET2</sub> |     |     |     |     |
|-------------------------------------------------------------------------------------------------|-----|-----|-----|-----|
|                                                                                                 | CMR | PMR | SMD | PMD |
| CMR                                                                                             | 0   | 0   | 0   | 0   |
| PMR                                                                                             | 0   | 2   | 0   | 0   |
| SMD                                                                                             | 0   | 0   | 5   | 0   |
| PMD                                                                                             | 0   | 0   | 0   | 4   |

| OSEM <sub>PET1</sub> /OSEM <sub>PET2</sub> versus PSF±TOF.EQ <sub>PET1</sub> /PSF±TOF.EQ <sub>PET2</sub> |     |     |     |     |
|----------------------------------------------------------------------------------------------------------|-----|-----|-----|-----|
|                                                                                                          | CMR | PMR | SMD | PMD |
| CMR                                                                                                      | 0   | 0   | 0   | 0   |
| PMR                                                                                                      | 0   | 2   | 0   | 0   |
| SMD                                                                                                      | 0   | 0   | 4   | 1   |
| PMD                                                                                                      | 0   | 0   | 0   | 4   |

| OSEM <sub>PET1</sub> /OSEM <sub>PET2</sub> versus PSF±TOF <sub>PET1</sub> /PSF±TOF <sub>PET2</sub> |     |     |     |     |
|----------------------------------------------------------------------------------------------------|-----|-----|-----|-----|
|                                                                                                    | CMR | PMR | SMD | PMD |
| CMR                                                                                                | 0   | 0   | 0   | 0   |
| PMR                                                                                                | 0   | 2   | 0   | 0   |
| SMD                                                                                                | 0   | 0   | 4   | 1   |
| PMD                                                                                                | 0   | 0   | 0   | 4   |
